# Supplementary material
Source: Springer Nature journal article supplement (https://www.springermedizin.de/resource/supplementary/13046_2008_123_MOESM6_ESM.pdf/9661676)

[H]

[R]

[L]

SP: 43.1mm  
ST: 4.0mm  
C388  
W776  
Not for diagnostic use

[F]

GE MEDICAL SYSTEMS

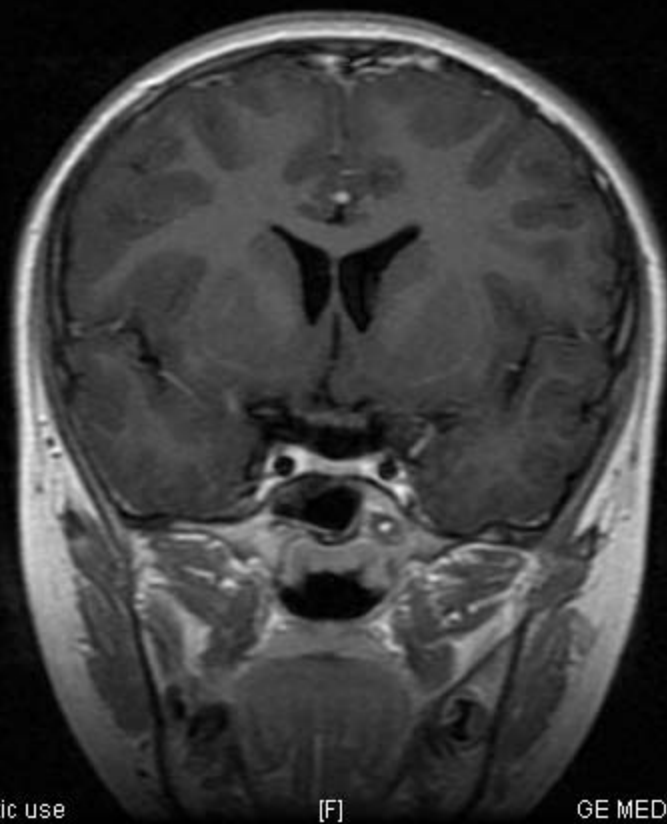

Supplement: MOESM6 [file 9661676]
